# Supplementary material
Source: MDPI journal article supplement (https://www.mdpi.com/2071-1050/14/21/13949)
Supplement: s1 [file s1 › Table S1.xlsx]

## Sheet: French Dairy Farms
PROFILE					OUTPUT VARIABLES		OUTPUT VARIABLES									INPUT VARIABLES
							COMPOSITION OF GROSS REVENUES†
No of Farm	Year	Animal	Farm Type	Other information	Gross Revenues (€/farm)*	Gross Margin (€/farm)*	Milk production sold to dairy enterprises (€)	Milk production manufactured on-farm (€)	Lambs sold for meat (€/farm)*	Lambs sold for meat [number of lambs]	Lambs sold for breeding (€/farm)*	revenue from cull animals (€/farm)	Wool and other products (€/farm)	Wool (Kg/farm)	Subsidies and compensations (€/farm)	number of productive animals (eg ewes)	human labor -family and hired - (Annual Labour Unit)	Labor cost (€/farm)	Feeds supplied (kg DM per farm)	Part of feed purchased [%]	Concentrates supplied (Kg per farm)	Part of the concentrates purchased (%)	Forages supplied (Kg DM per farm)	Part of the forages purchased (%)	Cost of purchased feed (€/farm)	Variable costs for home-grown feed (€/farm)	Other livestock variable cost (€/farm)	Fixed costs (€/farm)	Total production cost (€/farm)
2533F1000	2015	Sheep	Extensive milk	Western Pyrenees area, Manech or Basco-bearnaise breeds	94849.2	55601.7	65540.2	0	13154.6	326	800	2064.02	700	NA	12590.4	413	2.06	49362	123474	71.654	56867	100	74000	52.7027	28328.5	718.97	10200	60688.8	149298
2533F1001	2015	Sheep	Extensive milk	Western Pyrenees area, Manech or Basco-bearnaise breeds	59994.1	30959.7	42971.4	0	7870.05	218	0	392.6	900	NA	7860	326	1	26442	119961	78.3263	50530	100	76000	65.7895	23541.3	33.9992	5459.01	26948.1	82424.5
2533F1005	2015	Sheep	Extensive milk	Western Pyrenees area, Manech or Basco-bearnaise breeds	52988.2	29821.8	37590.7	0	6708.92	151	0	829.66	-10	NA	7869	299	1	26442	79652.8	61.0811	37532	100	47000	34.0426	18285.6	0	4880.75	38080.8	87689.2
3833F0228	2015	Sheep	Extensive milk	Western Pyrenees area, Manech or Basco-bearnaise breeds	130762	61023.1	0	109470	7367	165	1497	4490	90	NA	7848	309	2.37	56061.2	185158	43.2915	62250	100	131000	19.8473	29498.9	3767.02	36472.9	48689.5	174490
3833F1002	2015	Sheep	Extensive milk	Western Pyrenees area, Manech or Basco-bearnaise breeds	95739.5	53545.3	68190.4	0	12577.4	244	3570	2728.75	804	NA	7869	338	1.51	39927.4	164606	51.5404	70812	92.2612	103000	27.1845	26539.5	2333.89	13320.8	48561	130683
3833F1003	2015	Sheep	Extensive milk	Western Pyrenees area, Manech or Basco-bearnaise breeds	88676.8	50641.3	61130.4	0	14187.3	306	0	1666.46	676	NA	11016.6	445	1.79	47331.2	99693.9	84.9539	55970	100	51000	70.5882	26945	2952.85	8137.63	55523.2	140890
3833F1006	2015	Sheep	Extensive milk	Western Pyrenees area, Manech or Basco-bearnaise breeds	149897	107007	0	126490	7745.6	188	935	3799	3310	NA	7617	327	2.53	67588.9	167668	35.5869	55940	100	119000	9.2437	23008.5	4573.03	15308	58921.1	169399
3833F1007	2015	Sheep	Extensive milk	Western Pyrenees area, Manech or Basco-bearnaise breeds	174043	103341	136624	0	18153.6	444	0	2400.02	4800	NA	12065.8	570	0.84	22211.2	277405	50.2532	100465	100	190000	27.3684	45786.6	7782.15	17133.4	95191.9	188105
3833F1008	2015	Sheep	Extensive milk	Western Pyrenees area, Manech or Basco-bearnaise breeds	74201.4	34896.6	54439.7	0	10327.7	258	0	1590.22	-3750	NA	11593.7	442	1.83	48388.8	146953	68.0169	65463	100	90000	47.7778	28435.1	2885.31	7984.35	50682.6	138376
3833F1009	2015	Sheep	Extensive milk	Western Pyrenees area, Manech or Basco-bearnaise breeds	127447	82094	98407	0	16065	0	0	2730	598	NA	9647	418	1.53	40456.3	223916	30.2284	67720	57.1766	165000	20.6061	26941.6	4664.4	13747	102196	188006
5523F1000	2015	Sheep	Extensive milk	Western Pyrenees area, Manech or Basco-bearnaise breeds	56304.9	30960	40430.4	0	7931.11	184	0	1663.38	-350	NA	6630	266	0.74	19567.1	105279	52.5071	31355	100	78000	35.8974	17379	2860.43	5105.42	25126.4	70038.3
5523F1003	2015	Sheep	Extensive milk	Western Pyrenees area, Manech or Basco-bearnaise breeds	175784	126242	0	136320	18058	407	950	4531	1570	NA	14355	570	2.7	61379	176870	11.5593	81460	28.8485	106000	0	13597.1	8678.55	27266	82940.1	193861
5523F1004	2015	Sheep	Extensive milk	Western Pyrenees area, Manech or Basco-bearnaise breeds	132797	61552.9	0	102849	15106	339	245	3943.28	-96.18	NA	10750.2	395	1.98	52355.2	288576	20.9638	104110	40.2939	198000	12.1212	25140.8	6179.18	39924.6	129128	252728
5533F1001	2015	Sheep	Extensive milk	Western Pyrenees area, Manech or Basco-bearnaise breeds	103926	66653.5	77774	0	14194	328	0	1659	1486	NA	8813.28	388	1.07	28292.9	191889	45.281	43551	100	154000	31.8182	23433.9	5131.84	8707.01	47309.9	112876
5533F1004	2015	Sheep	Extensive milk	Western Pyrenees area, Manech or Basco-bearnaise breeds	75654.2	45822.1	56988	0	7756	214	0	820	3795	NA	6295.2	271	0.93	24591.1	93629	65.8226	46700	100	53000	39.6226	18812.2	3671.88	7348.02	35930.6	90353.7
5533F1005	2015	Sheep	Extensive milk	Western Pyrenees area, Manech or Basco-bearnaise breeds	62039.8	25479.6	45507	0	8142.79	232	0	1580.52	1170	NA	5639.45	267	0.73	19302.6	110440	56.5373	51080	100	66000	27.2727	20838.8	3826	11895.4	35638.7	91501.6
5533F1008	2015	Sheep	Extensive milk	Western Pyrenees area, Manech or Basco-bearnaise breeds	100540	70812.8	73061.1	0	14293.1	387	0	1385.77	1320	NA	10480	400	1.8	47595.6	182401	29.825	62530	100	128000	0	20870	3886.04	4971.14	33249	110572
5533F1009	2015	Sheep	Extensive milk	Western Pyrenees area, Manech or Basco-bearnaise breeds	116406	63212.2	88666.4	0	14241.1	331	290	2623.31	1010	NA	9575	415	1.72	45480.2	207662	52.0153	101910	94.7601	119000	20.1681	33676.8	5909.26	13607.5	70594.2	169268
5533F1010	2015	Sheep	Extensive milk	Western Pyrenees area, Manech or Basco-bearnaise breeds	81175	28021.3	53996	0	12796	286	1334	3139	-2491	NA	12401	396	1	26442	138566	95.6699	37432	100	106000	94.3396	43759.7	20.0175	9373.99	30004.6	109600
5533F1011	2015	Sheep	Extensive milk	Western Pyrenees area, Manech or Basco-bearnaise breeds	74095.1	56134.1	52468	0	10714	244	0	474	3357	NA	7082.1	265	1.43	37812.1	49830.8	55.8506	30840	100	23000	4.34783	9041.78	4037.17	4882.01	32302.6	88075.6
5533F1012	2015	Sheep	Extensive milk	Western Pyrenees area, Manech or Basco-bearnaise breeds	144106	112196	0	125873	9226	218	0	1653	-1564	NA	8918.2	352	1.9	50239.8	112129	63.435	39229	100	78000	47.4359	19738.5	2129.88	10042	79977	162127
5573F1001	2015	Sheep	Extensive milk	Western Pyrenees area, Manech or Basco-bearnaise breeds	87689	61191.5	64598	0	11232	233	0	1235	1192	NA	9432	396	1.8	42510.9	132125	26.9444	48420	84.5105	90000	0	15314.3	5878.51	5304.72	48787.4	117796
5583F1000	2015	Sheep	Extensive milk	Western Pyrenees area, Manech or Basco-bearnaise breeds	93038	29841.5	0	77882.8	8961.26	202	0	0	-1675	NA	7869	305	1.75	46273.5	158445	81.6972	54535	100	111000	73.8739	37768.1	646.705	24781.7	74719.4	184189
5583F1001	2015	Sheep	Extensive milk	Western Pyrenees area, Manech or Basco-bearnaise breeds	19961.9	12784.1	12525	0	3819.62	92	0	176.35	-834.55	NA	4275.49	171	0.71	18773.8	58005	12.8954	11500	34.7826	48000	8.33333	2208.58	1124.15	3845.04	28549.1	54500.7
5583F1002	2015	Sheep	Extensive milk	Western Pyrenees area, Manech or Basco-bearnaise breeds	72155.2	39629.7	54101	0	7427.7	178	476.36	1150	1000	NA	8000.15	323	1.2	27637.1	97955.9	36.8329	58570	51.1815	47000	21.2766	14907.7	8536.14	9081.72	37798.4	97961.1
2603F1002	2015	Sheep	Extensive milk	Roquefort area, Lacaune breed	180123	115213	122962	0	35464	600	0	3985	5188	NA	12524.2	529	2	54743.1	305821	35.4582	107840	45.2337	212000	31.1321	33876	16274.9	14758.8	92140.4	211793
2613F1010	2015	Sheep	Extensive milk	Roquefort area, Lacaune breed	182692	143736	133354	0	23843.1	445	5930.53	3684.45	2920.16	NA	12960	498	2.02	52715.8	365862	15.2182	103290	37.477	276000	7.97101	19898.7	6781.77	12274.9	111831	203502
2623F1004	2015	Sheep	Extensive milk	Roquefort area, Lacaune breed	132172	99820.5	94105	0	24412	359	0	3785	296	NA	9573.95	400	0.98	25913.2	245776	5.81591	58363	28.1514	195000	0	12708	7792.42	11851	69561.2	127826
2663F1005	2015	Sheep	Extensive milk	Roquefort area, Lacaune breed	100672	71200.1	76773	0	13970	281	0	3519	-1095	NA	7505.2	310	1.5	35349	209595	16.0117	47810	56.6409	168000	5.95238	12894.1	4689	11889	68829.4	133651
2723F1009	2015	Sheep	Extensive milk	Roquefort area, Lacaune breed	172894	130120	118626	0	27475	445	4491.18	7585	3036	NA	11681.2	510	2.61	73815	379937	13.6329	116020	36.4549	279000	5.37634	23200.9	6110.08	13463.2	112445	229034
2723F1010	2015	Sheep	Extensive milk	Roquefort area, Lacaune breed	123021	76929.6	81649.3	0	19712.2	324	0	1629.82	9537.46	NA	10492	407	1.74	46009.1	361460	19.1024	98230	80.7951	276000	0	28119.9	4922.82	13048.4	83271.6	175372
2723F1011	2015	Sheep	Extensive milk	Roquefort area, Lacaune breed	102711	76203.6	70588.2	0	14206.1	216	5808.9	4560	1305	NA	6242.74	257	0.93	24132	191418	10.6578	61400	36.3192	138000	0.724638	13528.4	5096.95	7881.97	59551.2	110191
2723F1012	2015	Sheep	Extensive milk	Roquefort area, Lacaune breed	113062	92524.6	77393.5	0	24828.5	411	0	2411.44	-654	NA	9082.5	382	1.98	52355.2	276321	2.59122	56691	14.5173	227000	0	4126.11	8617.76	7793.49	61300.7	134193
2723F1015	2015	Sheep	Extensive milk	Roquefort area, Lacaune breed	110828	80498.7	77417.5	0	12987	252	10336	4733.37	-2512.2	NA	7866.64	324	1.49	39398.5	260850	6.43459	83736	17.5492	188000	2.12766	7247.93	10665.7	12415.9	79554.6	149283
2733F1010	2015	Sheep	Extensive milk	Roquefort area, Lacaune breed	126922	94404	83567.1	0	20820.4	309	7438.65	7861	-2200	NA	9434.88	388	2.49	64137.5	272612	3.88363	58175	1.16029	222000	4.5045	4644.51	13013.2	14860.3	71380.6	168036
2733F1011	2015	Sheep	Extensive milk	Roquefort area, Lacaune breed	126405	91418.7	86619	0	25858	389	0	3921	212.8	NA	9794.46	378	3	79366	237450	12.2082	83276	40.0115	165000	0	16785.1	7945.45	10256	86064.2	200417
2733F1012	2015	Sheep	Extensive milk	Roquefort area, Lacaune breed	210028	168454	135474	0	44404.1	691	0	10332.8	-764	NA	20582.1	664	2.94	77739.5	492567	1.05975	165020	3.63592	349000	0	4606.27	17570.6	19397.5	116198	235512
3943F1003	2015	Sheep	Extensive milk	Roquefort area, Lacaune breed	210328	137790	154155	0	37016.5	508	0	6961	1037	NA	11158.5	435	1.98	53175.2	435457	28.9359	105123	74.3558	344000	16.8605	42172.1	13030	17336.3	102201	227915
3943F1004	2015	Sheep	Extensive milk	Roquefort area, Lacaune breed	87139.7	68506.5	60486.5	0	21527.2	401	0	1269	-3868	NA	7725	299	1	26442	154133	16.4893	49578	31.1025	111000	10.8108	10842.5	2637.11	5153.58	57208.2	102283
3943F1005	2015	Sheep	Extensive milk	Roquefort area, Lacaune breed	93077.9	51067.9	63828.7	0	18081.2	278	0	4017	404	NA	6747	263	1	28011.9	205566	53.8236	61570	62.8066	152000	50.6579	20902.8	6304.13	14803	51797.4	121819
3943F1006	2015	Sheep	Extensive milk	Roquefort area, Lacaune breed	148501	102527	100206	0	31132	453	0	4596	2658	NA	9909.08	404	2.21	58436.8	332193	9.64589	81831	45.0086	261000	0	17708.9	8740.64	19524.4	65601.1	170012
4773F1005	2015	Sheep	Extensive milk	Roquefort area, Lacaune breed	117577	74385.8	74437.8	0	20075.5	333	4311.31	2710.5	6153.5	NA	9888.71	392	1.7	44951.4	253526	17.1623	69570	50.4097	195000	6.66667	20945.6	7599.9	14646	80478	168621
4803F1002	2015	Sheep	Extensive milk	Roquefort area, Lacaune breed	153741	102799	107201	0	20045	295	10112	5890	263	NA	10230	396	0.99	26177.6	326731	11.5297	81300	53.2595	256000	0	22373.1	11703	16865.9	87210.8	164330
4803F1003	2015	Sheep	Extensive milk	Roquefort area, Lacaune breed	312468	234693	234014	0	32406	445	20554	15362	-3657	NA	13789	620	2.17	57150.7	575437	16.782	205100	54.1199	397000	0	38810.1	18555.7	20408.9	95166.6	230092
5543F1000	2015	Sheep	Extensive milk	Roquefort area, Lacaune breed	201318	150058	119940	0	33458	547	20952.7	7986.35	895.19	NA	18086.2	739	1.98	52221.6	344220	0.252745	106000	0.943396	252000	0	5005.03	27057.8	19197.2	160238	263720
5543F1001	2015	Sheep	Extensive milk	Roquefort area, Lacaune breed	82757.3	57766.7	52584	0	17771.6	290	0	2690.55	681.1	NA	9030	366	1.06	25596.8	190333	17.182	65900	25.6449	133000	13.5338	11584.9	7953.52	5452.07	54082.4	104670
5543F1002	2015	Sheep	Extensive milk	Roquefort area, Lacaune breed	157160	106545	105076	0	20694.9	317	13706.7	6800	225	NA	10657.5	420	1.01	26770.2	337565	8.89162	99500	34.6734	251000	0	20379.8	17780.2	12454.7	102725	180110
5543F1003	2015	Sheep	Extensive milk	Roquefort area, Lacaune breed	169545	125377	118543	0	20587.6	312	14490.9	5955	570.15	NA	9397.5	389	1.47	33817.7	310870	14.4851	58471	45.272	260000	8.46154	17010.9	11199.1	15957.4	111775	189760
5543F1005	2015	Sheep	Extensive milk	Roquefort area, Lacaune breed	108901	70974.6	77436.5	0	14188.1	233	6483.55	3661	44.7	NA	7087.5	334	0.99	26177.6	233198	27.838	70342	37.4485	172000	24.4186	18979.5	9946.22	9001.11	47201.7	111306
5543F1006	2015	Sheep	Extensive milk	Roquefort area, Lacaune breed	196012	141639	130483	0	24546.8	371	18711.6	11136.4	-1571.4	NA	12705	501	2.21	58436.9	278686	14.2944	100789	45.4306	191000	0	23494.6	18184.4	12693.2	98213.6	211023
5553F1000	2015	Sheep	Extensive milk	Roquefort area, Lacaune breed	161435	124979	103310	0	37920.8	587	1625.4	3850	-1539.3	NA	16268.8	578	3	79626	479607	1.96999	125985	8.62007	370000	0	4942.63	19253.3	12260	163187	279269
5553F1001	2015	Sheep	Extensive milk	Roquefort area, Lacaune breed	228403	177335	165742	0	42520.2	731	0	4025	-1767.5	NA	17882.9	712	3.85	103229	564064	8.87022	126510	45.4589	454000	0	19451.2	19399.7	12217.4	122798	277095
5553F1002	2015	Sheep	Extensive milk	Roquefort area, Lacaune breed	159824	110289	118306	0	22450	449	665	8570.06	207	NA	9626.41	393	2.49	62165.8	344102	9.53253	94370	39.9523	262000	0	12017.3	7842.48	29675.1	73998.8	185700
5553F1005	2015	Sheep	Extensive milk	Roquefort area, Lacaune breed	186896	117507	137785	0	28694	470	0	4930	3985	NA	11501.6	532	2.96	78416.3	556494	18.3135	156890	45.3598	420000	9.52381	38735.5	14631.1	16022.2	110046	257851
5553F1006	2015	Sheep	Extensive milk	Roquefort area, Lacaune breed	115941	81564	77353.1	0	23493.7	410	1200	3579	246.11	NA	10068.7	422	2.97	72996.7	247409	7.80061	71735	26.117	185000	1.62162	11485.7	10943.1	11947.8	74472.4	181846
5553F1007	2015	Sheep	Extensive milk	Roquefort area, Lacaune breed	115033	83402.4	69531.8	0	32308.4	456	0	5225	-2000	NA	9967.4	457	2.23	49745.3	251366	6.43764	72834	25.5375	198000	0	9540.01	12097.5	9992.77	88935.2	170311
5563F1003	2015	Sheep	Extensive milk	Roquefort area, Lacaune breed	147708	116310	102419	0	31167.2	464	0	7149.83	-5356	NA	12328.1	477	1.26	33316.9	287711	4.78074	114610	13.7946	190000	0	8134.71	12633.9	10629.1	112694	177408
5563F1004	2015	Sheep	Extensive milk	Roquefort area, Lacaune breed	105891	65737.1	73032.1	0	22395.8	340	0	2711.5	-511	NA	8262.45	333	0.81	21454.5	194470	35.1597	61460	69.8991	142000	21.831	25056.1	4593.96	10503.7	60578.6	122187
5563F1005	2015	Sheep	Extensive milk	Roquefort area, Lacaune breed	197755	126609	128265	0	42902	657	0	6515.11	4334.91	NA	15738	609	2.48	55806.1	387345	19.4877	132580	41.1676	272000	10.2941	32836.6	21269.9	17040.1	138239	265191
5563F1006	2015	Sheep	Extensive milk	Roquefort area, Lacaune breed	140478	78772.6	82420.8	0	35845	514	0	9178.46	-2966.3	NA	16000.3	584	2.2	56409	479242	11.4727	161198	39.2052	339000	0	30749.9	16671.8	14284	109056	227171
